# Supplementary material for: The Properties and Domain Requirements for Phase Separation of the Sup35 Prion Protein In Vivo
Source: MDPI journal article supplement (doi:10.3390/biom13091370), 2023-09-10
Supplement: s1 [file s1]

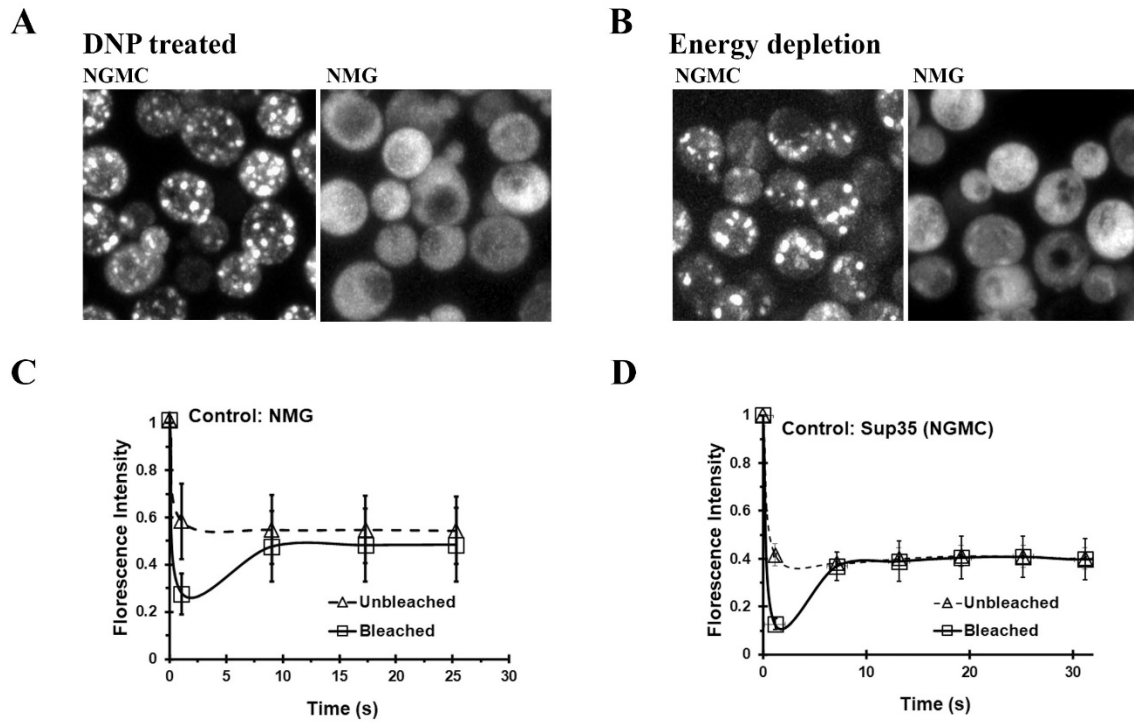

Figure S1. The NM domains of Sup35 do not form condensates when yeast are treated with 2,4 DNP or energy depleted in a different yeast strain. A, Yeast expressing either Sup35(NGMC) or NM-GFP in the 779-6A strain were incubated in 2 mM DNP, 100 mM phosphate buffer (pH 5.0) for 60 min prior to imaging. B, Yeast expressing either Sup35(NGMC) or NMG in the 74D-694 strain were incubated in SD media without glucose with 20 mM deoxyglucose and 10  $\mu$ M Antimycin A for 60 min prior to imaging. C, Fluorescence recovery after photobleaching of yeast expressing NM-GFP in SD media with glucose. D, Fluorescence recovery after photobleaching of yeast expressing NGMC in SD media with glucose. The yeast expressing NGMC in the 779-6A and yeast expressing NGMC in the 74D-694 strain are listed in Table 1 as 1074 and L2888 strains, respectively.

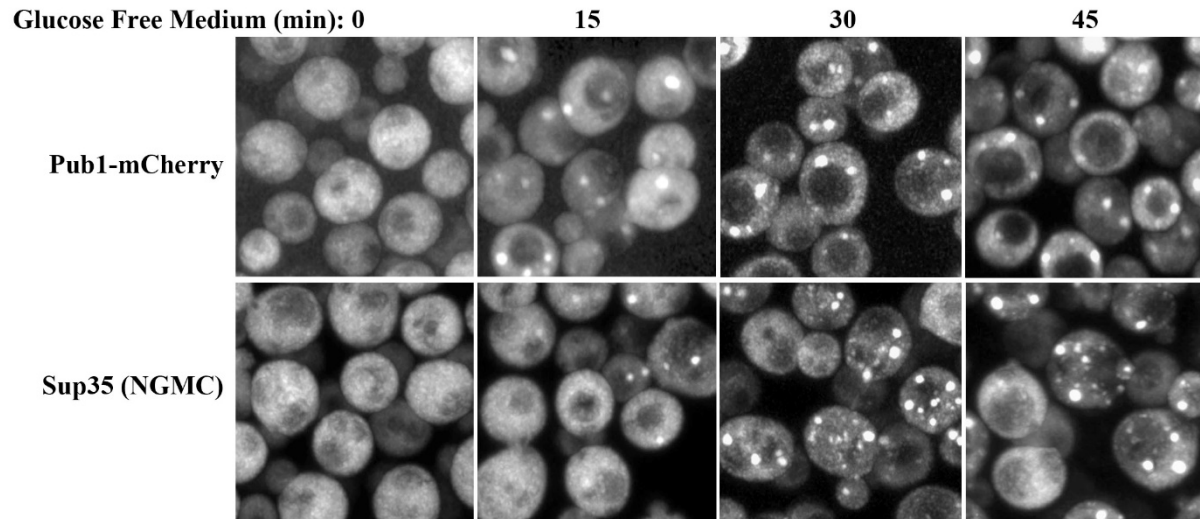

Figure S2. Stress granules form at a faster rate in glucose free media than Sup35 condensates. Maximized Z-stack confocal images of yeast either expressing Pub1-mCherry, a stress granule marker protein, or Sup35 (NGMC) when incubated for the indicated times in glucose free media. The 779-6A strain was transformed with Pub1-mCherry plasmid, whereas the NGMC was expressed from the *SUP35* locus in the 779-6A strain (referred to as the 1074 strain in Table1).

**Table S1:** Imaris parameters for finding aggregates using spot detection. \*

---

[Algorithm]

Enable Region Of Interest = false

Enable Region Growing = true

Enable Tracking = false

[Source Channel]

Source Channel Index = 1

Estimated XY Diameter = 0.426  $\mu\text{m}$

Estimated Z Diameter = 0.852  $\mu\text{m}$

Background Subtraction = true

[Classify Spots]

"Quality" above automatic threshold

[Spot Region Type]

Region Growing Type = Local Contrast

[Spot Regions]

Region Growing Automatic Threshold = true

Region Growing Manual Threshold = 10.498

Region Growing Diameter = Diameter From Border

Create Region Channel = false

---

\* To determine colocalization, the Spots Colocalization Tool was used with a parameter of 0.25 (empirically determined).
